# Supplementary material
Source: MDPI journal article supplement (https://www.mdpi.com/2571-6255/6/3/110)
Supplement: s1 [file s1]

Title: Species-Specific Responses of Medium and Large Mammals to Fire Regime Attributes in a Fire-Prone Neotropical Savanna

## Supplementary material

Table S1. Model selection evaluating the effect of spatial scale on medium and large-sized mammal detection (p) and occupancy ( $\psi$ ) in Cerrado. K represents the number of parameters in the model, AICcWt and Cum.Wt indicate the relative weight of the model and the accumulated weight, respectively, and -2LL is the log-likelihood. Numbers 50, 250, and 500 represent the spatial scales in which the variables were measured. Spatial scales used in the analysis are in bold. Occupancy ( $\Psi$ ) was fitted using the fire regime variables at 250-m scale (div-freq + div-age + burned<2 + unburned>10, indicated as “fire regime”) for the NDVI spatial scale analysis. To compare the spatial scales of fire-related variables for  $\psi$ , we fitted detection (p) using NDVI at the spatial scale previously selected.

|                               | K                | AICc   | ΔAICc | AICcWt | Cum. Wt | -2LL    |
|-------------------------------|------------------|--------|-------|--------|---------|---------|
| <i>O. bezoarticus</i>         |                  |        |       |        |         |         |
| NDVI                          |                  |        |       |        |         |         |
| ψ(fire regime), p(NDVI50)     | 7                | 809.05 | 0     | 0.99   | 0.99    | -394.98 |
| ψ(fire regime), p(NDVI250)    | 7                | 818.25 | 9.2   | 0.01   | 1       | -399.58 |
| ψ(fire regime), p(NDVI500)    | 7                | 821.43 | 12.37 | 0      | 1       | -401.17 |
| DIV. FIRE FREQUENCY           |                  |        |       |        |         |         |
| ψ(DIV-FREQ250), p(NDVI50)     | 5                | 804.55 | 0     | 0.5    | 0.5     | -396.02 |
| ψ(DIV-FREQ500), p(NDVI50)     | 5                | 804.58 | 0.04  | 0.5    | 1       | -396.04 |
| ψ(DIV-FREQ50), p(NDVI50)      | Did not converge |        |       |        |         |         |
| DIV. FIRE AGE                 |                  |        |       |        |         |         |
| ψ(DIV-AGE50), p(NDVI50)       | 5                | 801.95 | 0     | 0.53   | 0.53    | -394.72 |
| ψ(DIV-AGE500), p(NDVI50)      | 5                | 803.45 | 1.5   | 0.25   | 0.78    | -395.48 |
| ψ(DIV-AGE250), p(NDVI50)      | 5                | 803.72 | 1.78  | 0.22   | 1       | -395.61 |
| AREA BURNT <2 YRS             |                  |        |       |        |         |         |
| ψ(BURNED<2Y250), p(NDVI50)    | 5                | 802.9  | 0     | 0.63   | 0.63    | -395.2  |
| ψ(BURNED<2Y500), p(NDVI50)    | 5                | 803.99 | 1.09  | 0.37   | 1       | -395.75 |
| ψ(BURNED<2Y50), p(NDVI50)     | Did not converge |        |       |        |         |         |
| AREA NOT BURNT >10 YRS        |                  |        |       |        |         |         |
| ψ(UNBURNED>10Y250), p(NDVI50) | 5                | 802.69 | 0     | 0.36   | 0.36    | -395.09 |
| ψ(UNBURNED>10Y500), p(NDVI50) | 5                | 802.87 | 0.18  | 0.33   | 0.7     | -395.18 |
| ψ(UNBURNED>10Y50), p(NDVI50)  | 5                | 803.05 | 0.37  | 0.3    | 1       | -395.28 |
| <i>Mazama</i> sp.             |                  |        |       |        |         |         |
| NDVI                          |                  |        |       |        |         |         |
| ψ(fire regime), p(NDVI50)     | 7                | 214.81 | 0     | 0.96   | 0.96    | -97.86  |
| ψ(fire regime), p(NDVI250)    | 7                | 221.64 | 6.84  | 0.03   | 0.99    | -101.28 |
| ψ(fire regime), p(NDVI500)    | 7                | 224.41 | 9.6   | 0.01   | 1       | -102.66 |

|                                                          |                  |        |      |      |      |         |
|----------------------------------------------------------|------------------|--------|------|------|------|---------|
| DIV. FIRE FREQUENCY                                      |                  |        |      |      |      |         |
| $\psi(\text{DIV-FREQ500}), p(\text{NDVI50})$             | 5                | 804.55 | 0    | 0.5  | 0.5  | -396.02 |
| $\psi(\text{DIV-FREQ50}), p(\text{NDVI50})$              | 5                | 804.58 | 0.04 | 0.5  | 1    | -396.04 |
| $\psi(\text{DIV-FREQ250}), p(\text{NDVI50})$             | Did not converge |        |      |      |      |         |
| DIV. FIRE AGE                                            |                  |        |      |      |      |         |
| $\psi(\text{DIV-AGE250}), p(\text{NDVI50})$              | 4                | 208.23 | 0    | 0.46 | 0.46 | -99.32  |
| $\psi(\text{DIV-AGE500}), p(\text{NDVI50})$              | 4                | 209.26 | 1.03 | 0.27 | 0.73 | -99.83  |
| $\psi(\text{DIV-AGE50}), p(\text{NDVI50})$               | 4                | 209.29 | 1.06 | 0.27 | 1    | -99.85  |
| AREA BURNT <2 YRS                                        |                  |        |      |      |      |         |
| $\psi(\text{BURNED}<2\text{Y250}), p(\text{NDVI50})$     | 4                | 208.85 | 0    | 0.35 | 0.35 | -99.62  |
| $\psi(\text{BURNED}<2\text{Y500}), p(\text{NDVI50})$     | 4                | 208.88 | 0.03 | 0.35 | 0.7  | -99.64  |
| $\psi(\text{BURNED}<2\text{Y50}), p(\text{NDVI50})$      | 4                | 209.2  | 0.36 | 0.3  | 1    | -99.8   |
| AREA NOT BURNT >10 YRS                                   |                  |        |      |      |      |         |
| $\psi(\text{UNBURNED}>10\text{Y250}), p(\text{NDVI50})$  | 4                | 207.03 | 0    | 0.39 | 0.39 | -98.72  |
| $\psi(\text{UNBURNED}>10\text{Y500}), p(\text{NDVI50})$  | 4                | 207.4  | 0.37 | 0.33 | 0.72 | -98.9   |
| $\psi(\text{UNBURNED}>10\text{Y50}), p(\text{NDVI50})$   | 4                | 207.74 | 0.71 | 0.28 | 1    | -99.07  |
| <i>C. brachyurus</i>                                     |                  |        |      |      |      |         |
| NDVI                                                     |                  |        |      |      |      |         |
| $\psi(\text{fire regime}), p(\text{NDVI250})$            | 7                | 430.9  | 0    | 0.53 | 0.53 | -205.9  |
| $\psi(\text{fire regime}), p(\text{NDVI500})$            | 7                | 432.5  | 1.61 | 0.24 | 0.77 | -206.71 |
| $\psi(\text{fire regime}), p(\text{NDVI50})$             | 7                | 432.54 | 1.64 | 0.23 | 1    | -206.72 |
| DIV. FIRE FREQUENCY                                      |                  |        |      |      |      |         |
| $\psi(\text{DIV-FREQ50}), p(\text{NDVI250})$             | 4                | 430.79 | 0    | 0.53 | 0.53 | -210.6  |
| $\psi(\text{DIV-FREQ250}), p(\text{NDVI250})$            | 4                | 432.37 | 1.58 | 0.24 | 0.77 | -211.38 |
| $\psi(\text{DIV-FREQ500}), p(\text{NDVI250})$            | 4                | 432.45 | 1.65 | 0.23 | 1    | -211.42 |
| DIV. FIRE AGE                                            |                  |        |      |      |      |         |
| $\psi(\text{DIV-AGE500}), p(\text{NDVI250})$             | 4                | 428    | 0    | 0.69 | 0.69 | -209.2  |
| $\psi(\text{DIV-AGE250}), p(\text{NDVI250})$             | 4                | 430.18 | 2.18 | 0.23 | 0.93 | -210.29 |
| $\psi(\text{DIV-AGE50}), p(\text{NDVI250})$              | 4                | 432.48 | 4.48 | 0.07 | 1    | -211.44 |
| AREA BURNT <2 YRS                                        |                  |        |      |      |      |         |
| $\psi(\text{BURNED}<2\text{Y250}), p(\text{NDVI250})$    | 4                | 427.21 | 0    | 0.62 | 0.62 | -208.81 |
| $\psi(\text{BURNED}<2\text{Y500}), p(\text{NDVI250})$    | 4                | 428.72 | 1.51 | 0.29 | 0.91 | -209.56 |
| $\psi(\text{BURNED}<2\text{Y50}), p(\text{NDVI250})$     | 4                | 430.96 | 3.74 | 0.09 | 1    | -210.68 |
| AREA NOT BURNT >10 YRS                                   |                  |        |      |      |      |         |
| $\psi(\text{UNBURNED}>10\text{Y500}), p(\text{NDVI250})$ | 4                | 432.36 | 0    | 0.35 | 0.35 | -211.38 |
| $\psi(\text{UNBURNED}>10\text{Y50}), p(\text{NDVI250})$  | 4                | 432.49 | 0.13 | 0.33 | 0.68 | -211.45 |
| $\psi(\text{UNBURNED}>10\text{Y250}), p(\text{NDVI250})$ | 4                | 432.52 | 0.17 | 0.32 | 1    | -211.46 |
| <i>T. terrestris</i>                                     |                  |        |      |      |      |         |
| NDVI                                                     |                  |        |      |      |      |         |
| $\psi(\text{fire regime}), p(\text{NDVI500})$            | 7                | 231.12 | 0    | 0.74 | 0.74 | -106.02 |
| $\psi(\text{fire regime}), p(\text{NDVI250})$            | 7                | 234.37 | 3.25 | 0.15 | 0.89 | -107.64 |
| $\psi(\text{fire regime}), p(\text{NDVI50})$             | 7                | 234.95 | 3.83 | 0.11 | 1    | -107.93 |
| DIV. FIRE FREQUENCY                                      |                  |        |      |      |      |         |
| $\psi(\text{DIV-FREQ250}), p(\text{NDVI500})$            | 4                | 222.77 | 0    | 0.82 | 0.82 | -106.59 |
| $\psi(\text{DIV-FREQ500}), p(\text{NDVI500})$            | 4                | 226.13 | 3.36 | 0.15 | 0.97 | -108.26 |
| $\psi(\text{DIV-FREQ50}), p(\text{NDVI500})$             | 4                | 229.27 | 6.5  | 0.03 | 1    | -109.84 |

|                                                                               |          |               |          |             |             |                |
|-------------------------------------------------------------------------------|----------|---------------|----------|-------------|-------------|----------------|
| DIV. FIRE AGE                                                                 |          |               |          |             |             |                |
| <b><math>\psi(\text{DIV-AGE250}), p(\text{NDVI500})</math></b>                | <b>4</b> | <b>231.51</b> | <b>0</b> | <b>0.35</b> | <b>0.35</b> | <b>-110.95</b> |
| $\psi(\text{DIV-AGE50}), p(\text{NDVI500})$                                   | 4        | 231.64        | 0.13     | 0.33        | 0.68        | -111.02        |
| $\psi(\text{DIV-AGE500}), p(\text{NDVI500})$                                  | 4        | 231.7         | 0.19     | 0.32        | 1           | -111.05        |
| AREA BURNT <2 YRS                                                             |          |               |          |             |             |                |
| <b><math>\psi(\text{BURNED}&lt;2\text{Y250}), p(\text{NDVI500})</math></b>    | <b>4</b> | <b>231.29</b> | <b>0</b> | <b>0.37</b> | <b>0.37</b> | <b>-110.84</b> |
| $\psi(\text{BURNED}<2\text{Y50}), p(\text{NDVI500})$                          | 4        | 231.61        | 0.32     | 0.32        | 0.69        | -111.01        |
| $\psi(\text{BURNED}<2\text{Y500}), p(\text{NDVI500})$                         | 4        | 231.61        | 0.32     | 0.31        | 1           | -111.01        |
| AREA NOT BURNT >10 YRS                                                        |          |               |          |             |             |                |
| <b><math>\psi(\text{UNBURNED}&gt;10\text{Y500}), p(\text{NDVI500})</math></b> | <b>4</b> | <b>230.9</b>  | <b>0</b> | <b>0.39</b> | <b>0.39</b> | <b>-110.65</b> |
| $\psi(\text{UNBURNED}>10\text{Y250}), p(\text{NDVI500})$                      | 4        | 231.18        | 0.28     | 0.34        | 0.74        | -110.79        |
| $\psi(\text{UNBURNED}>10\text{Y50}), p(\text{NDVI500})$                       | 4        | 231.71        | 0.81     | 0.26        | 1           | -111.05        |

Table S2. Results for the spatial autocorrelation test using Moran's Index (I). Iobs and Iexp represent observed and expected Moran's Index, respectively. If p-value is > 0.05, the null hypothesis of no correlation between sampling units is accepted.

| <b>Species</b>        | <b>Iobs</b> | <b>Iexp</b> | <b>Standard deviation</b> | <b>p-value</b> |
|-----------------------|-------------|-------------|---------------------------|----------------|
| <i>O. bezoarticus</i> | 0.02        | -0.03       | 0.05                      | 0.23           |
| <i>Mazama</i> sp.     | -0.06       | -0.03       | 0.04                      | 0.59           |
| <i>C. brachyurus</i>  | -0.08       | -0.03       | 0.05                      | 0.29           |
| <i>T. terrestris</i>  | 0.04        | -0.03       | 0.05                      | 0.1            |

Table S3. Number of records (detections), number of sampling sites with detections, naïve occupancy, estimated detection probability ( $p$ ), estimated occupancy probability ( $\psi$ ), and relative abundance of large sized mammals of a Neotropical savanna. Detection and occupancy probability and standard deviation estimated by model averaging of models with  $\Delta AICc < 4$ .

| <b>Species</b>        | <b>Detections</b> | <b>Sites with detection</b> | <b>Naïve occupancy</b> | <b>Detection probability (<math>p</math>) <math>\pm</math> SD</b> | <b>Occupancy probability (<math>\psi</math>) <math>\pm</math> SD</b> |
|-----------------------|-------------------|-----------------------------|------------------------|-------------------------------------------------------------------|----------------------------------------------------------------------|
| <i>O. bezoarticus</i> | 123               | 25                          | 0.83                   | 0.09 $\pm$ 0.04                                                   | 0.90 $\pm$ 0.06                                                      |
| <i>C. brachyurus</i>  | 52                | 16                          | 0.53                   | 0.05 $\pm$ 0.01                                                   | 0.60 $\pm$ 0.20                                                      |
| <i>Mazama</i> sp      | 29                | 7                           | 0.24                   | 0.04 $\pm$ 0.06                                                   | 0.38 $\pm$ 0.10                                                      |
| <i>T. terrestris</i>  | 23                | 11                          | 0.37                   | 0.03 $\pm$ 0.02                                                   | 0.53 $\pm$ 0.34                                                      |

Table S4. Model selection used to evaluate the effect of NDVI, season (wet or dry), and method (photo or video) on medium and large-sized mammals detection (p) in Cerrado. K represents the number of parameters in the model, AICcWt and Cum.Wt indicate the relative weight of the model and the accumulated weight, respectively, and -2LL is the log-likelihood. Occupancy ( $\Psi$ ) was fitted using the fire regime variables (div-freq + div-age + burned<2 + unburned>10).

|                                                 | K | AICc   | $\Delta$ AICc | AICcWt | Cum.Wt | -2LL    |
|-------------------------------------------------|---|--------|---------------|--------|--------|---------|
| <b><i>O.bezoarticus</i></b>                     |   |        |               |        |        |         |
| $\psi$ (fire regime), p(NDVI)                   | 7 | 809.05 | 0             | 0.63   | 0.63   | -394.98 |
| $\psi$ (fire regime), p(NDVI + season)          | 8 | 810.97 | 1.91          | 0.24   | 0.87   | -394.05 |
| $\psi$ (fire regime), p(NDVI + method)          | 8 | 812.75 | 3.69          | 0.1    | 0.97   | -394.94 |
| $\psi$ (fire regime), p(NDVI + season + method) | 9 | 814.96 | 5.91          | 0.03   | 1      | -393.98 |
| $\psi$ (fire regime), p(.)                      | 6 | 826.79 | 17.73         | 0      | 1      | -405.57 |
| $\psi$ (fire regime), p(season)                 | 7 | 828.3  | 19.24         | 0      | 1      | -404.6  |
| $\psi$ (fire regime), p(method)                 | 7 | 830.2  | 21.14         | 0      | 1      | -405.55 |
| $\psi$ (fire regime), p(season + method)        | 8 | 831.97 | 22.92         | 0      | 1      | -404.56 |
| <b><i>Mazama sp.</i></b>                        |   |        |               |        |        |         |
| $\psi$ (fire regime), p(NDVI)                   | 7 | 214.81 | 0             | 0.56   | 0.56   | -97.86  |
| $\psi$ (fire regime), p(NDVI + method)          | 8 | 216.46 | 1.66          | 0.24   | 0.8    | -96.8   |
| $\psi$ (fire regime), p(NDVI + season)          | 8 | 217.9  | 3.09          | 0.12   | 0.92   | -97.52  |
| $\psi$ (fire regime), p(NDVI + season + method) | 9 | 220    | 5.19          | 0.04   | 0.96   | -96.5   |
| $\psi$ (fire regime), p(.)                      | 6 | 221.43 | 6.62          | 0.02   | 0.98   | -102.89 |
| $\psi$ (fire regime), p(season)                 | 7 | 222.89 | 8.08          | 0.01   | 0.99   | -101.9  |
| $\psi$ (fire regime), p(method)                 | 7 | 224.08 | 9.27          | 0.01   | 1      | -102.49 |
| $\psi$ (fire regime), p(season + method)        | 8 | 225.91 | 11.1          | 0      | 1      | -101.52 |
| <b><i>C. brachyurus</i></b>                     |   |        |               |        |        |         |
| $\psi$ (fire regime), p(.)                      | 6 | 430.13 | 0             | 0.39   | 0.39   | -207.24 |
| $\psi$ (fire regime), p(NDVI)                   | 7 | 430.9  | 0.77          | 0.26   | 0.65   | -205.9  |
| $\psi$ (fire regime), p(method)                 | 7 | 432.85 | 2.72          | 0.1    | 0.75   | -206.88 |
| $\psi$ (fire regime), p(season)                 | 7 | 432.87 | 2.74          | 0.1    | 0.85   | -206.89 |
| $\psi$ (fire regime), p(NDVI + season + method) | 8 | 433.79 | 3.66          | 0.06   | 0.91   | -205.47 |
| $\psi$ (fire regime), p(NDVI + season)          | 8 | 434.06 | 3.94          | 0.05   | 0.96   | -205.6  |
| $\psi$ (fire regime), p(season + method)        | 8 | 435.72 | 5.59          | 0.02   | 0.99   | -206.43 |
| $\psi$ (fire regime), p(NDVI + method)          | 9 | 437.16 | 7.03          | 0.01   | 1      | -205.08 |
| <b><i>T.terrestris</i></b>                      |   |        |               |        |        |         |
| $\psi$ (fire regime), p(NDVI)                   | 7 | 231.12 | 0             | 0.44   | 0.44   | -106.02 |
| $\psi$ (fire regime), p(.)                      | 6 | 232.15 | 1.03          | 0.27   | 0.71   | -108.25 |
| $\psi$ (fire regime), p(NDVI + season)          | 8 | 234.39 | 3.27          | 0.09   | 0.8    | -105.77 |
| $\psi$ (fire regime), p(NDVI + season + method) | 8 | 234.88 | 3.75          | 0.07   | 0.86   | -106.01 |
| $\psi$ (fire regime), p(season)                 | 7 | 234.91 | 3.79          | 0.07   | 0.93   | -107.91 |
| $\psi$ (fire regime), p(method)                 | 7 | 235.58 | 4.45          | 0.05   | 0.98   | -108.24 |
| $\psi$ (fire regime), p(NDVI + method)          | 9 | 238.53 | 7.41          | 0.01   | 0.99   | -105.77 |
| $\psi$ (fire regime), p(season + method)        | 8 | 238.68 | 7.55          | 0.01   | 1      | -107.91 |
